# Supplementary material for: The sulfur- and halogen-rich super eruption Los Chocoyos and its impacts on climate and environment
Source: Copernicus journal article supplement (doi:10.5194/acp-2019-827), 2019-09-24
Supplement: Supplementary file 1 [file acp-2019-827-supplement.pdf]

# Supplementary material to “The sulfur- and halogen-rich super eruption Los Chocoyos and its impacts on climate and environment”

Hans Brenna<sup>1</sup>, Steffen Kutterolf<sup>2</sup>, Michael J. Mills<sup>3</sup>, Kirstin Krüger<sup>1</sup>

<sup>1</sup>Section for Meteorology and Oceanography, Department of Geosciences, University of Oslo, P.O. Box 1022 Blindern, 0315, Oslo, Norway.

<sup>2</sup>GEOMAR | Helmholtz Centre for Ocean Research Kiel, Wischhofstrasse 1-3, 24148, Kiel, Germany

<sup>3</sup>Atmospheric Chemistry Observations & Modeling Laboratory, National Center for Atmospheric Research, P.O. Box 3000, Boulder, Colorado 80307-3000, USA

Correspondence: Kirstin Krüger ([kkrueger@geo.uio.no](mailto:kkrueger@geo.uio.no))

# Supplementary figures

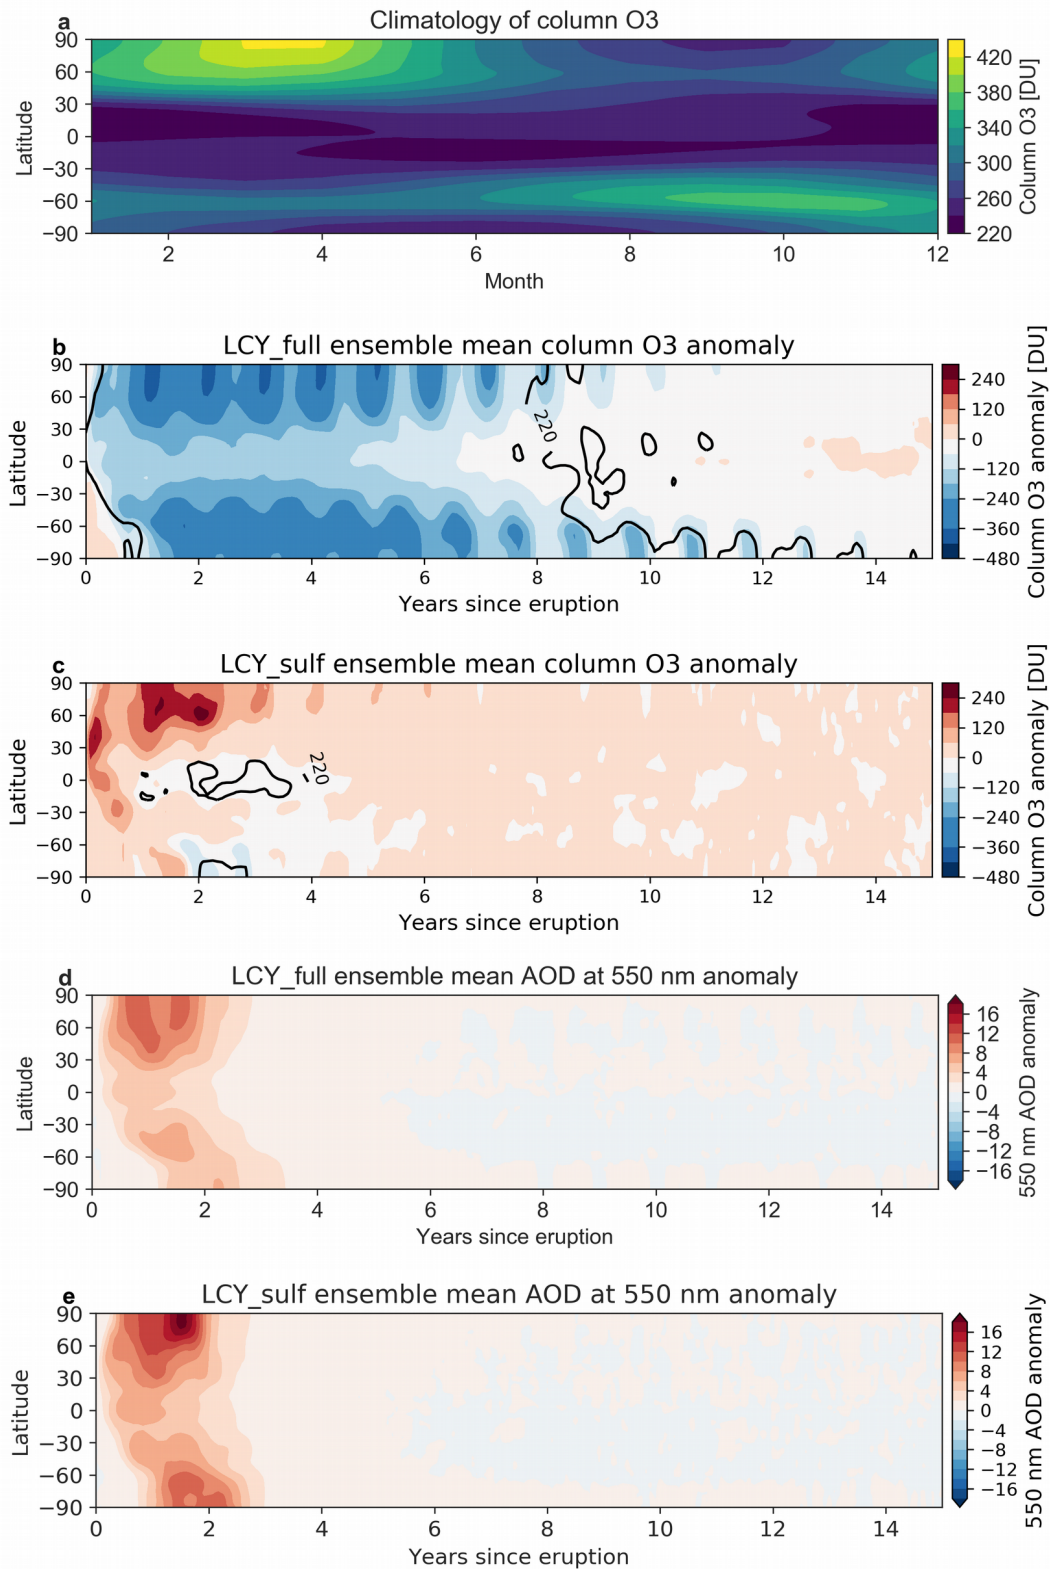

Figure S1: Zonal mean ozone and AOD evolution after the Los Chocoyos eruption. (a) Column ozone climatology for the CTR. (b) LCY\_full ensemble mean column ozone anomaly. (c) LCY\_sulf ensemble mean column ozone anomaly. (d) LCY\_full ensemble mean AOD anomaly. (e) LCY\_sulf ensemble mean AOD anomaly

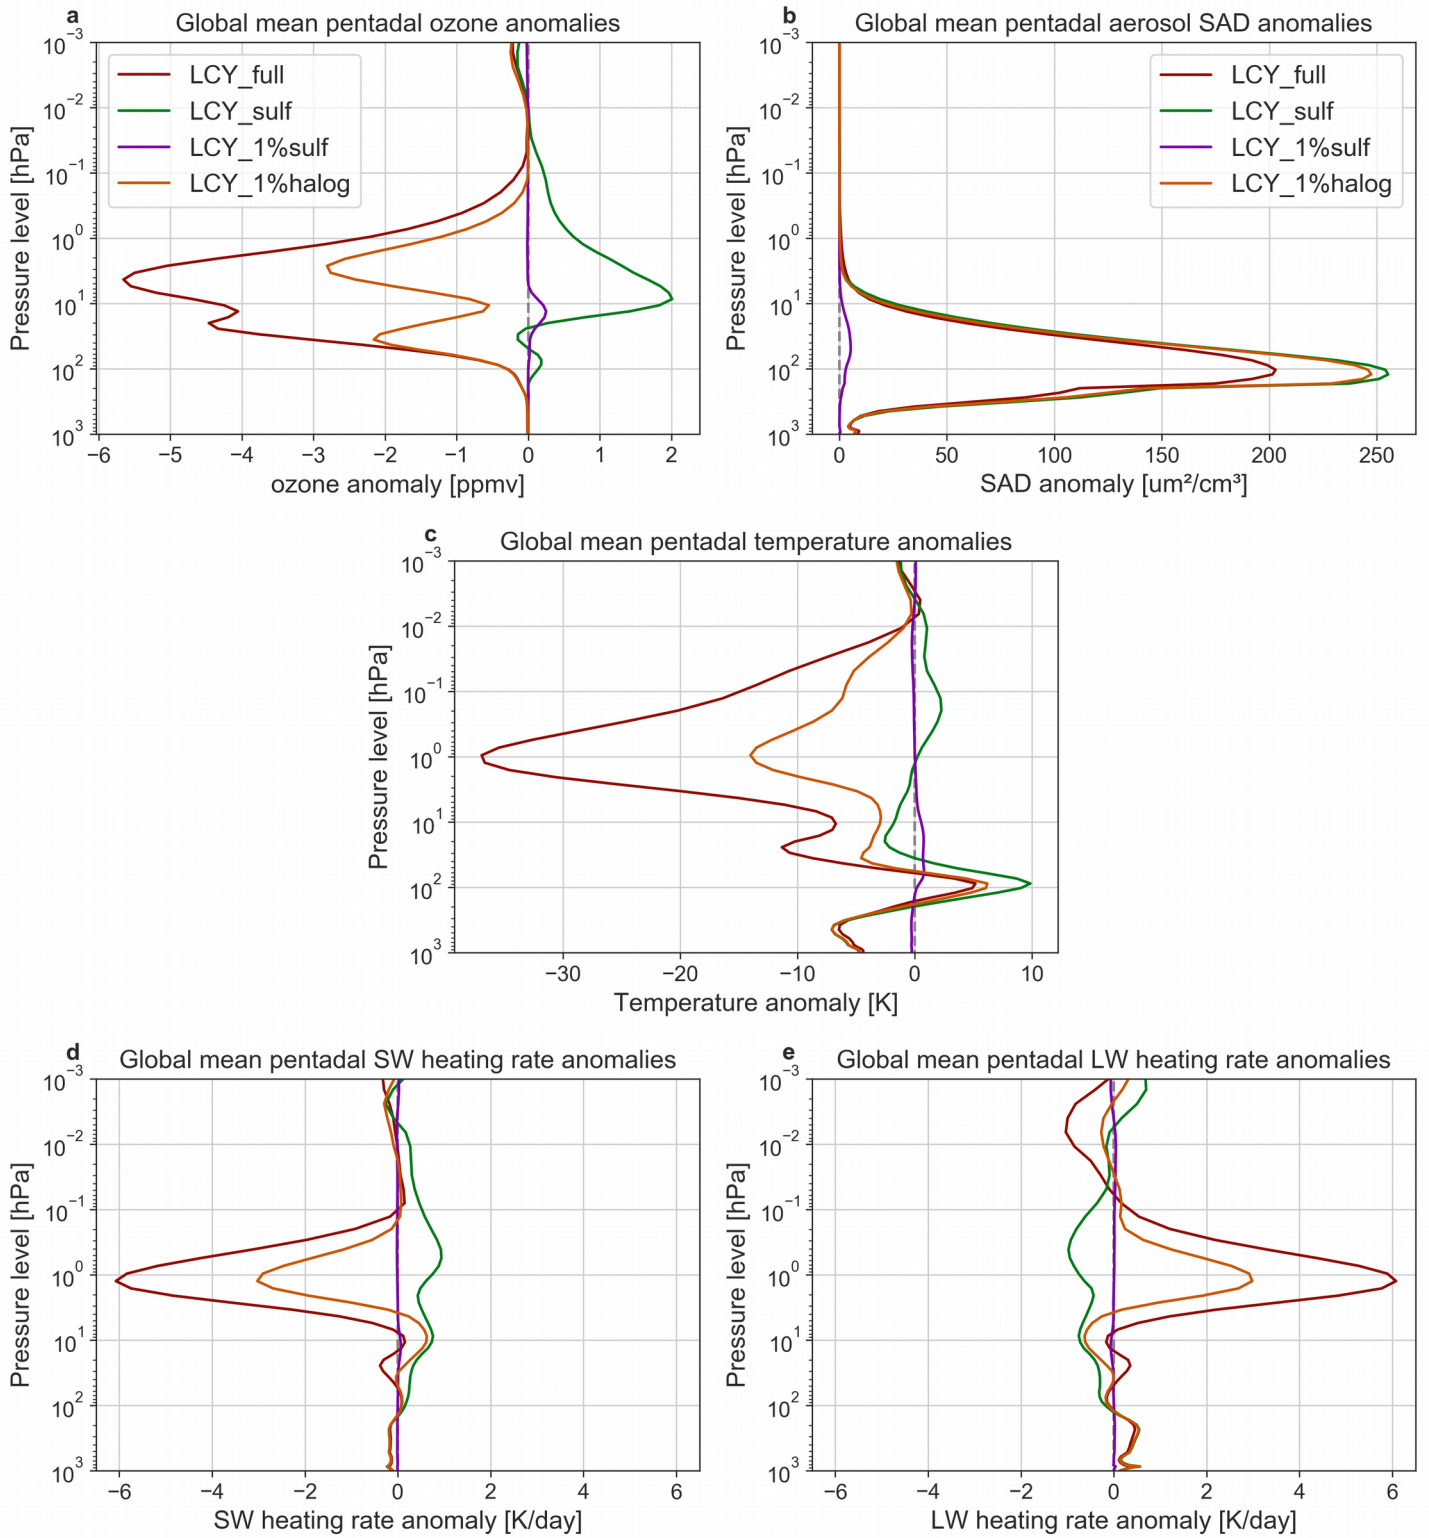

Figure S2: Global mean pentadal anomaly profiles of (a) ozone, (b) aerosol surface area density (SAD), (c) temperature, (d) short wave heating rate and (d) long wave heating rate of the LCY eruption scenarios.

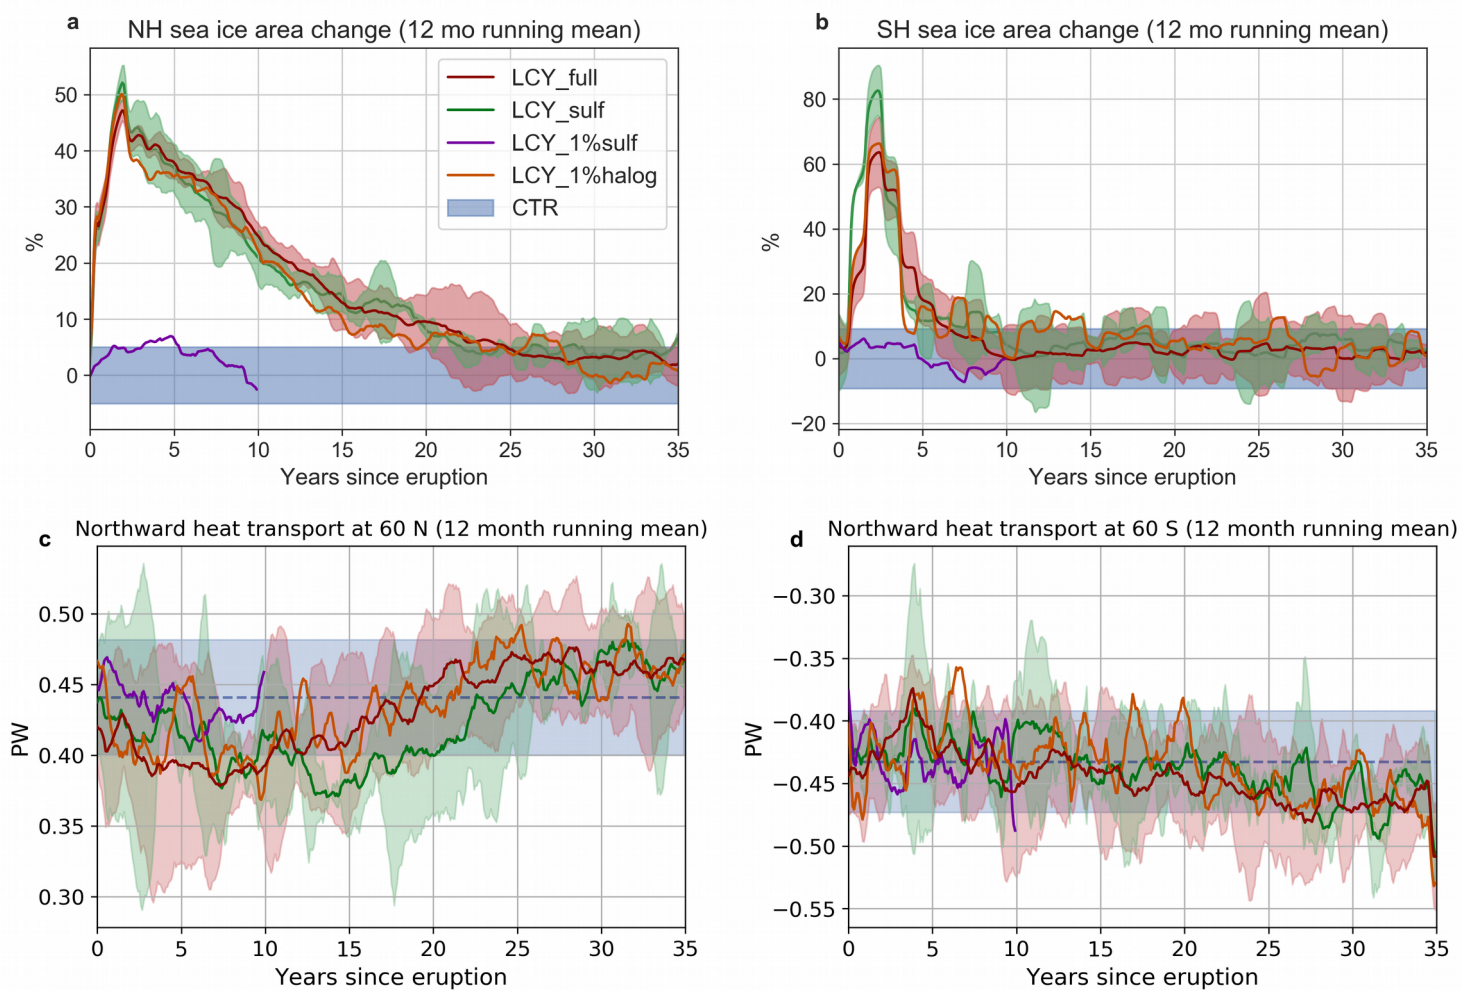

Figure S3: Hemispheric mean sea ice changes and. (a) NH, (b) SH. Northward ocean heat transport at (c) 60°N, and (d) 60°S for CTR, LCY\_full and LCY\_sulf ensembles.

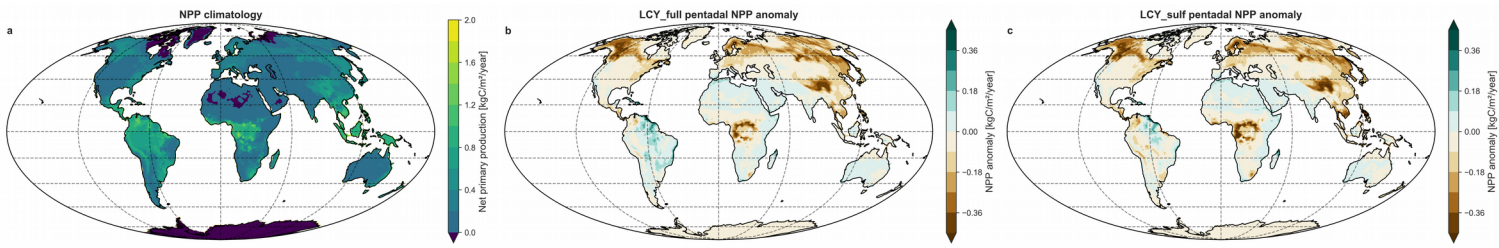

Figure S4: Global maps of net primary productivity (NPP) climatology for CTR (a) and post-eruption pentadal anomalies for LCY\_full (b) and LCY\_sulf (c) ensembles. White areas on the map indicates invalid values.
